# Supplementary material for: Physicochemical characterization and antibacterial activities of silver nanoparticles prepared by amidated low-methoxyl pectin
Source: Royal Society of Chemistry journal article supplement (doi:10.1039/d4ra07060g), 2024-01-01
Supplement: d4ra07060g1.pdf [file d4ra07060g1.pdf]

Electronic supplementary information

**Physicochemical characterization and antibacterial activities of silver nanoparticles prepared by amidated low-methoxyl pectin**

Pei-jun Li <sup>a,b,\*</sup>, Run-sheng Xie <sup>a,b</sup>, Jiang-juan Pan <sup>b</sup>, Yu-qiu Jiang <sup>a,b</sup>, Xing Liu <sup>c</sup>

*a Guangdong Provincial Key Laboratory of Utilization and Conservation of Food and Medicinal Resources in Northern Region, College of Food Science & Technology, Shaoguan University, Shaoguan 512005, China*

*b College of Chemistry and Bioengineering, Guilin University of Technology, Guilin 541004, China*

*c Institute for Agro-food Standards and Testing Technology, Shanghai Academy of Agricultural Sciences, Shanghai, 201403, China*

\* Corresponding Author

E-mail address: peijunli@sgu.edu.cn

Tel: +86-751-8120167.

## 1. Pectin molecular weight

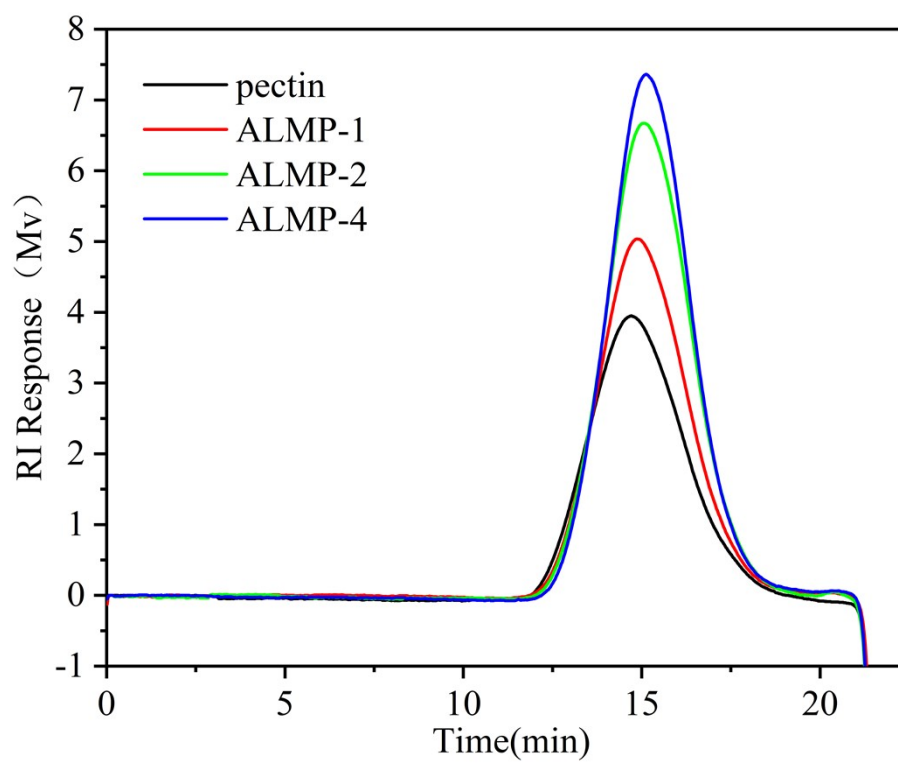

**Fig. S1.** Molecular weight distribution of pectin modified by different amides

## 2. Particle size distribution

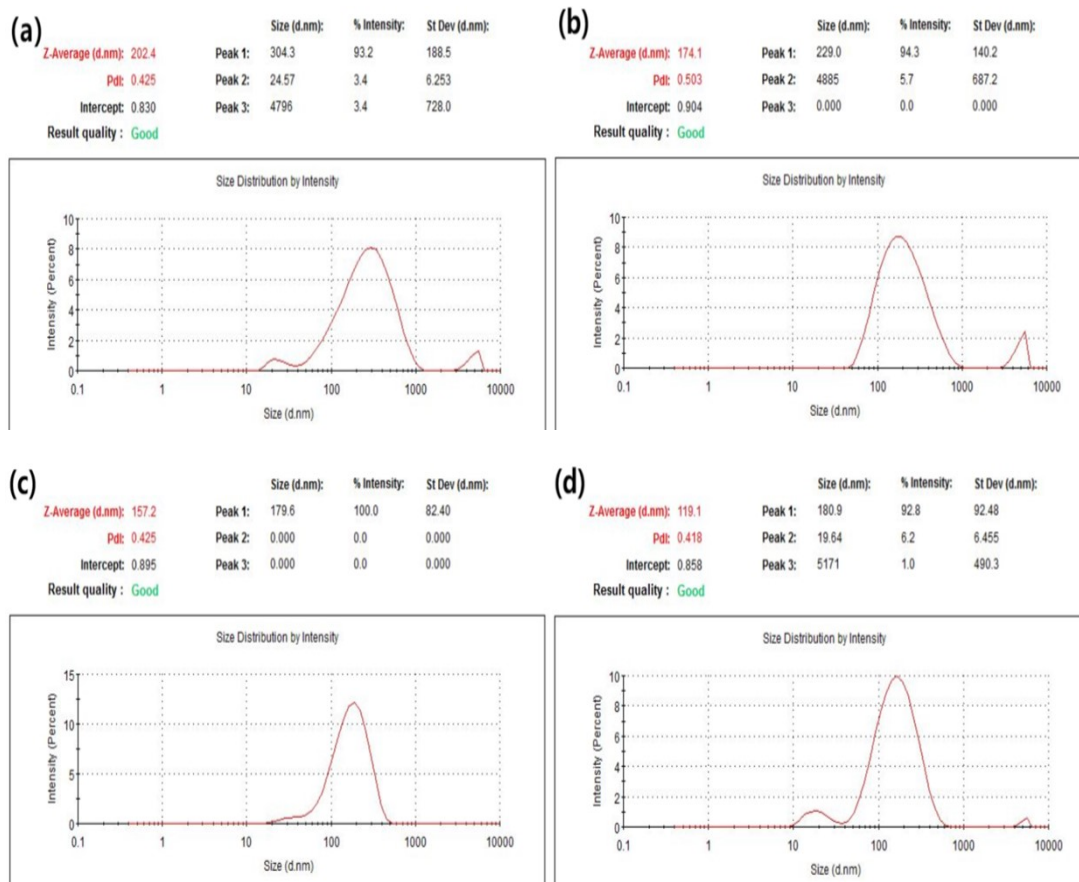

**Fig. S2.** Particle size distribution of HMP-Ag (a), ALMP-1-Ag (b), ALMP-2-Ag (c), and ALMP-4-Ag (d), respectively.

### 3. Zeta potential

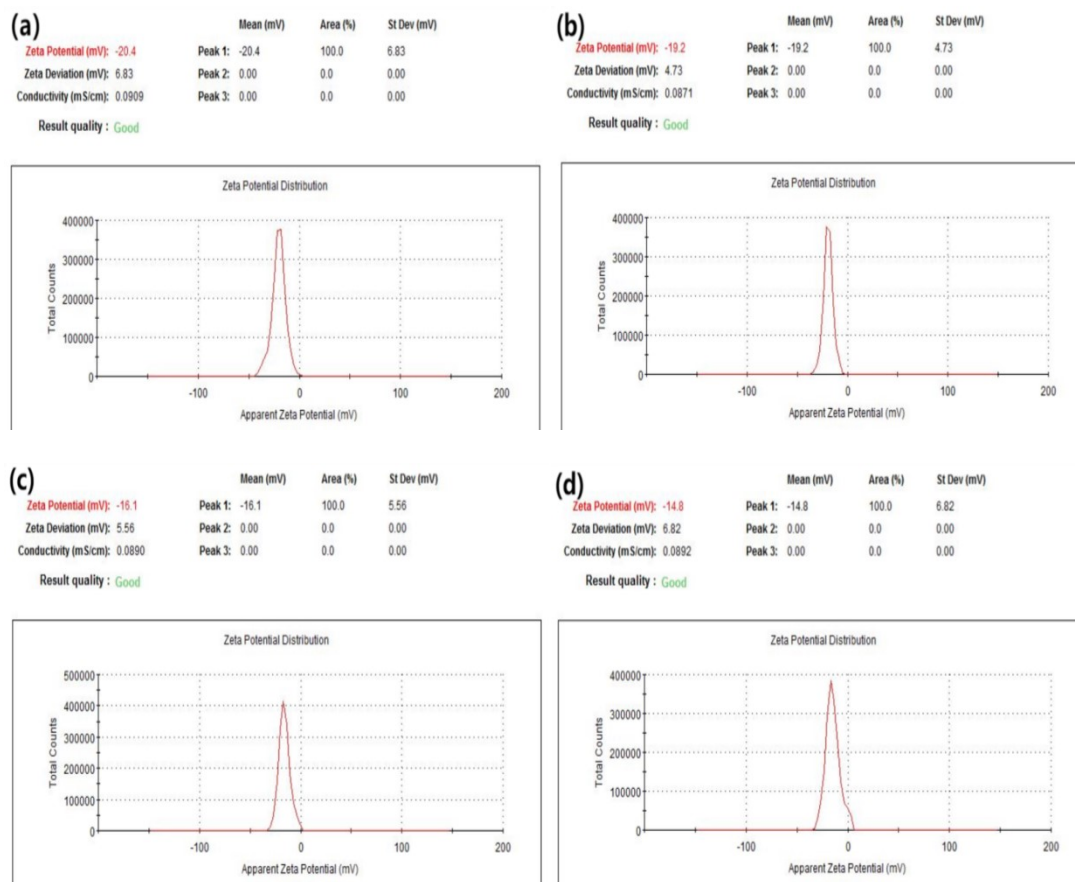

**Fig. S3.** Zeta potential of HMP-Ag (a), ALMP-1-Ag (b), ALMP-2-Ag (c), and ALMP-4-Ag (d), respectively.
